# Supplementary material for: A facile one-pot strategy for fabrication of carbon-based microwave absorbers: effects on annealing and paraffin content
Source: Royal Society of Chemistry journal article supplement (doi:10.1039/c7dt01471f), 2017-01-01
Supplement: c7dt01471f1.pdf [file c7dt01471f1.pdf]

## Electronic Supplementary Information

A facile one-pot strategy for fabrication of carbon-based  
microwave absorbers: effects on annealing and paraffin content

*Yanan Zhang,<sup>a</sup> Bin Quan,<sup>a</sup> Wei Liu,<sup>a</sup> Xiaohui Liang,<sup>a</sup> Guangbin Ji,<sup>a,\*</sup> and Youwei  
Du<sup>b</sup>*

<sup>a</sup> College of Materials Science and Technology, Nanjing University of Aeronautics  
and Astronautics, Nanjing, 210016, P. R. China

<sup>b</sup> Laboratory of Solid State Microstructures, Nanjing University, Nanjing 210093, P. R.  
China

\* Corresponding authors: E-mail: [gaji@nuaa.edu.cn](mailto:gaji@nuaa.edu.cn) (G.B. Ji)

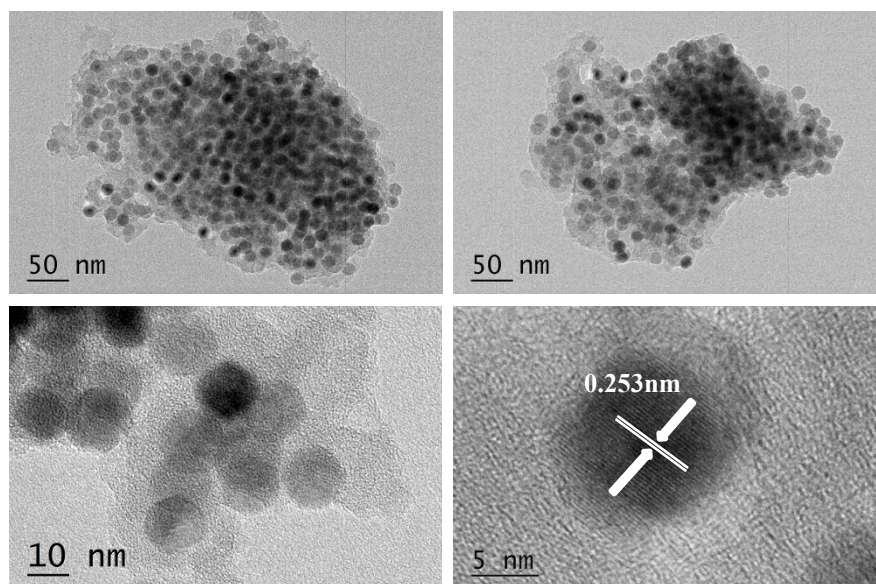

**Figure S1.** The permittivity and permeability values of S500, S600 and S700.

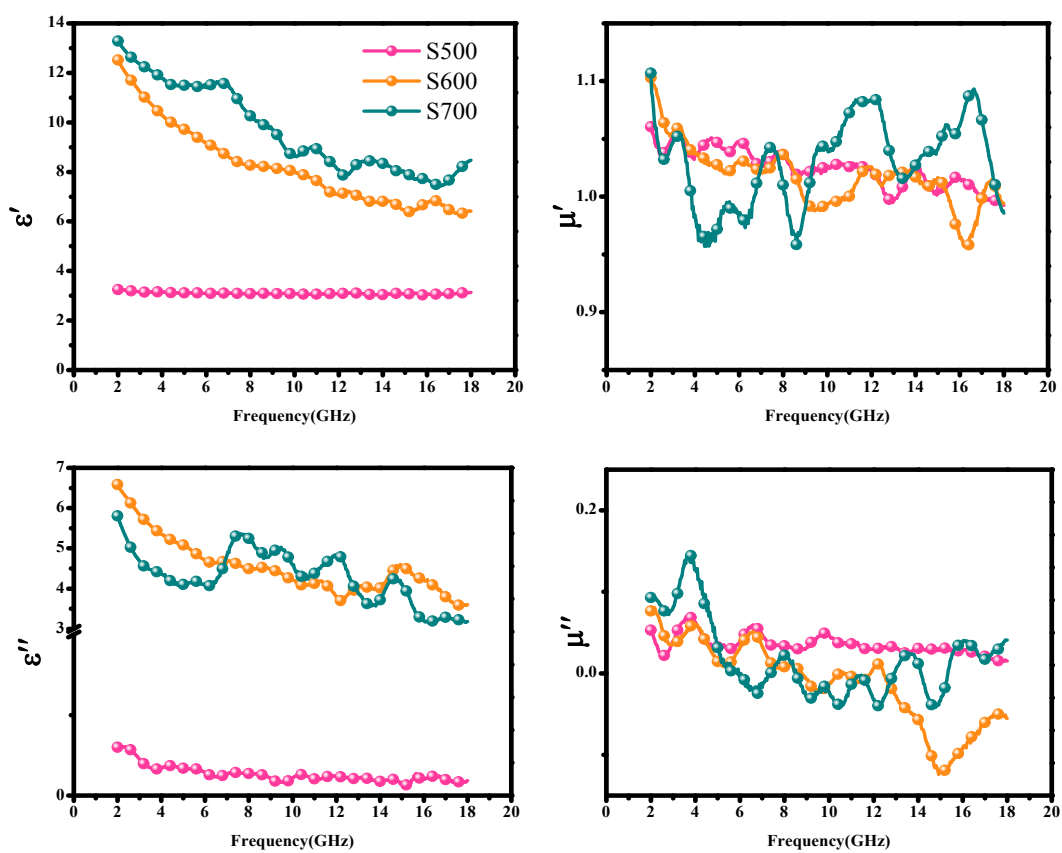

**Figure S2.** (a, b, c) The TEM images of S500. (d) HRTEM image of  $\text{Fe}_3\text{O}_4$  nanoparticle.

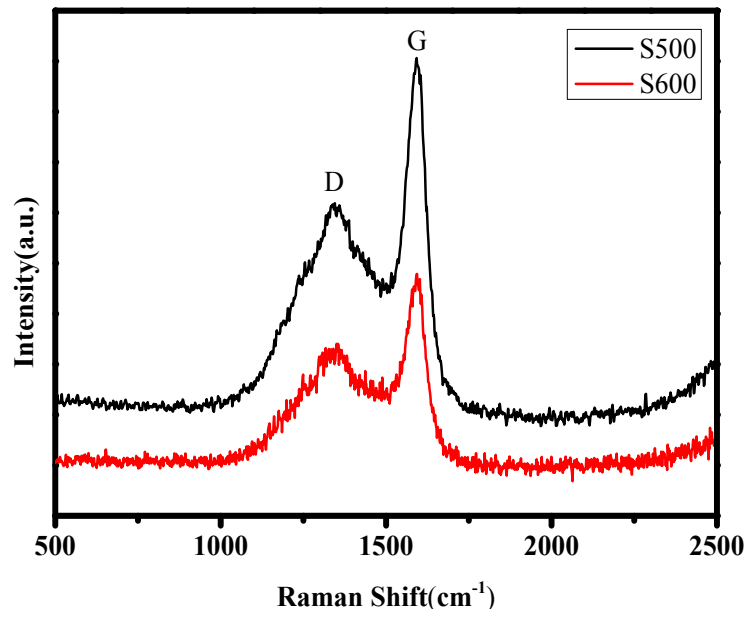

**Figure S3.** The Raman spectrum of S500 and S600.

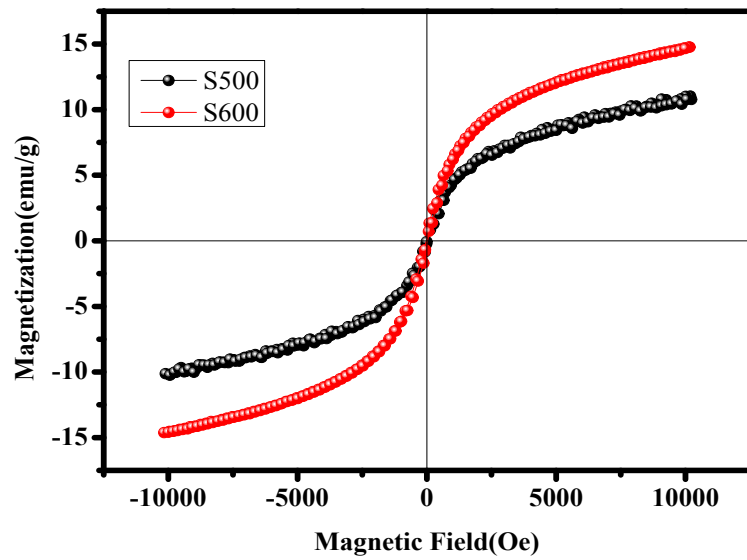

**Figure S4.** The magnetic hysteresis loop of S500 and S600.

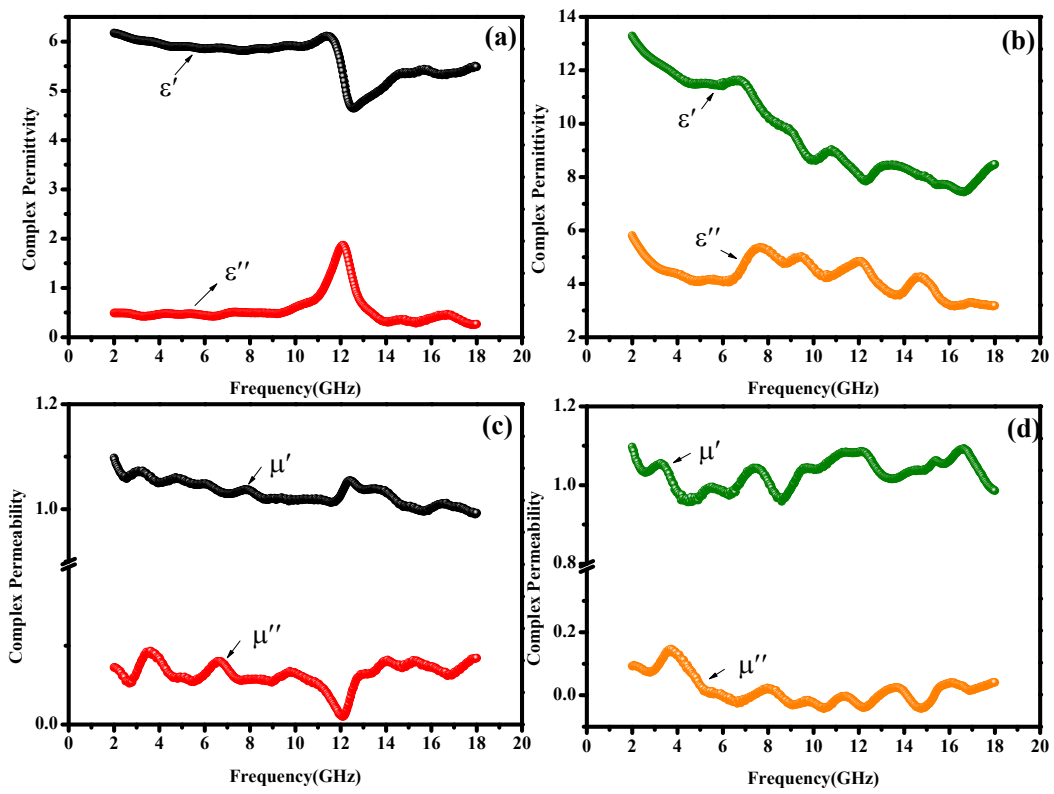

**Figure S5.** (a, b) The complex permeability of S37 and S46; (c, d) the complex permeability of S37 and S

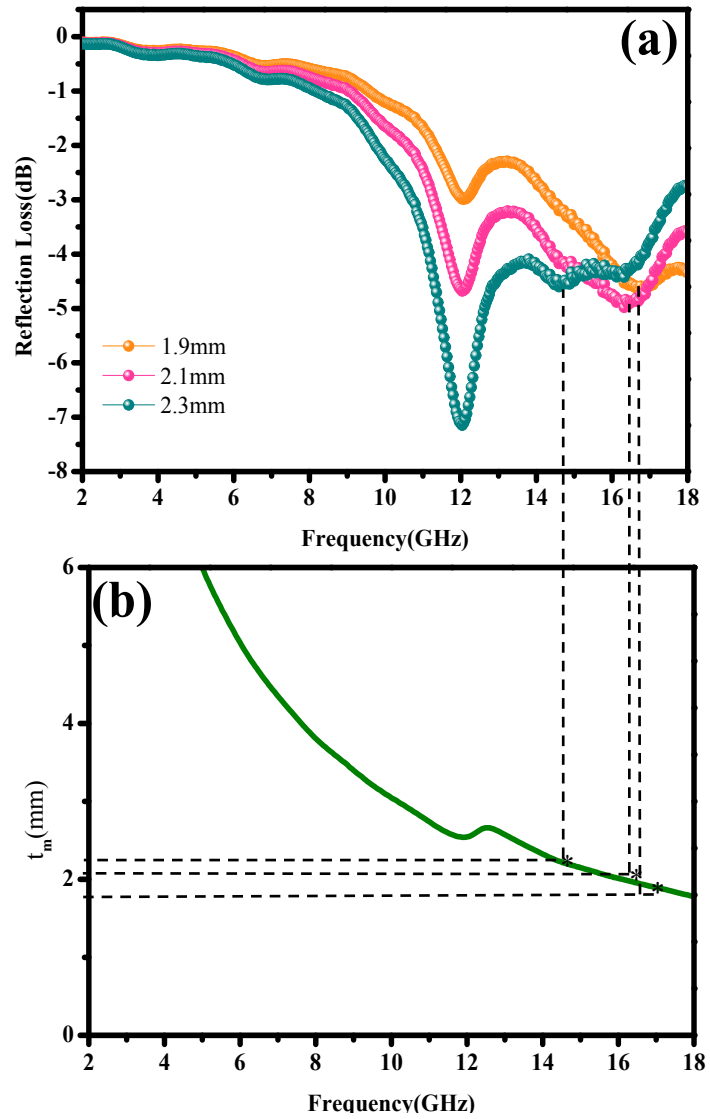

**Figure S6.** (a)The reflection loss curves of S37 at the thickness of 1.9, 2.1 , 2.3 mm; (b) the quarter wavelength ( $\lambda/4$ ) versus frequency.

**Table S1.** Magnetic parameters of S500, S600 and S700.

|      | Ms(emu/g) | Hc(Oe) | Mr(emu/g) |
|------|-----------|--------|-----------|
| S500 | 10.7      | 12     | 0.06      |
| S600 | 14.7      | 22     | 0.18      |
| S700 | 19.0      | 634    | 4.85      |

**Table S2.** microwave absorption properties of some reported absorbing materials.

| Sample                            | RI <sub>min</sub> (dB) | $f_e$ | $d$ (mm) | Wt%   | Ref.      |
|-----------------------------------|------------------------|-------|----------|-------|-----------|
| Fe <sub>3</sub> C/graphitic       | -26                    | 2     | 2.0      | 70%   | 43        |
| Fe <sub>3</sub> C@C               | -38                    | 4     | 1.9      | 40%   | 44        |
| Fe/C                              | -16                    | 3.4   | 2.0      | 12.5% | 45        |
| Fe-Fe <sub>3</sub> C/C            | -15.5                  | 5.0   | 1.5      | 33%   | 45        |
| Fe <sub>3</sub> O <sub>4</sub> @C | -20                    | 3     | 2.0      | 50%   | 46        |
| h-Ni/graphene                     | -16                    | 3     | 4.0      | 60%   | 47        |
| Ni@C nanorods                     | -26.3                  | 5.2   | 2.3      | 40%   | 48        |
| carbon-coated Fe <sub>3</sub> C   | -34.6                  | 5.5   | 1.9      | 40%   | this work |
